# Supplementary material for: From Paper to Pixels: A Pre‐ and Post-Implementation Analysis of Electronic Health Records in Maternal and Child Health in Zimbabwe
Source: Research Square preprint supplement (doi:10.21203/rs.3.rs-7026812/v1), 2025-09-09
Supplement: Supplementary file 1 [file bfd877340c0a2a2ebb22f7a5.docx]

**DEPARTMENT OF GLOBAL, PUBLIC HEALTH AND FAMILY MEDICINE**

P. O. Box A178

Avondale

Harare, Zimbabwe

Telephone: +263 (242)791631

Ext. 2276/2277

Email: [globalpublichealthfm@medsch.uz.ac.zw](mailto:globalpublichealthfm@medsch.uz.ac.zw)

Chairman: Dr R Makurumidze, MBChB (UZ), MPH (UZ), PhD (VUB)


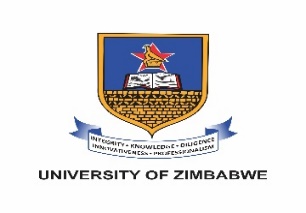


**FACULTY OF MEDICINE AND HEALTH SCIENCES**

**English** Informed Consent Form – Key Informant

***STUDY TITLE:*** ***Evidence Generation On The Impact Of Digital Health Systems On Reproductive, Maternal, Newborn And Child Health Outcomes.***

Principal Investigator: Dr Richard Makurumidze

Phone number(s): +263772759296

**WHAT YOU SHOULD KNOW ABOUT THIS RESEARCH STUDY:**

This study aims to generate evidence on the impact of digital health systems on Reproductive, Maternal, Newborn, and Child Health outcomes in Zimbabwe to inform future digital health advancements in the country.

1. We give you this consent so that you may read about the purpose, risks, and benefits of this research study.
2. We cannot promise that this research will benefit you directly
3. You have the right to agree to take part now, change your mind later or to refuse to take part
4. Whatever you decide, it will not affect your interactions with the Ministry of Health and Child Care
5. Please review this consent form carefully. Ask any questions before you make a decision
6. Your participation is voluntary.

**PURPOSE**

You are being asked to participate in a research study of assessing the impact of digital health systems on reproductive, maternal, newborn, and child health outcomes. The purpose of the study is to ascertain how the Electronic Health Record (EHR) system implementation has affected maternal and neonatal health outcomes, including the cost-effectiveness, in Zimbabwe.You were selected to participate in this study because of your role as a key stakeholder in move from paper based to digital health system.. There will be approximately 600 participants in this study.

**PROCEDURES AND DURATION**

If you decide to participate, we will discuss about the benefits, challenges and barriers of implementing EHR at sites you will be representing. This will include your views on effects both to clients and the functionality of the health facility. The discussion will be guided by an interview guide and is expected to take about 20-25 minutes.

**RISKS AND DISCOMFORTS**

Some participants might feel uncomfortable when discussing some challenges they encounter during service provision. We reassure you that responses collected will be held in privacy and confidentiality will be maintained. Your participation in the study will not affect their relationship with the MoHCC

**BENEFITS AND/OR COMPENSATION**

There are no direct benefits for you as a participant in this study. Generating evidence on the impact of digital health systems on Reproductive, Maternal, Newborn and Child Health Outcomes will provide critical review that will be utilized in planning and subsequent policy generation as Zimbabwe continues to embrace technological advancements in its healthcare system. This evaluation will be instrumental in strengthening the health data system from which decisions are made.

**CONFIDENTIALITY**

If you indicate your willingness to participate in this study by signing this document, the records will be kept in strict confidentiality under lock and key. They will only be available to authorized study staff. The records will not be discussed with any people who are not part of the study staff

Under some circumstances, the JREC or MRCZ may need to review the study documents for compliance audits.

**ADDITIONAL COSTS**

There will be no additional costs to your participation in this study

**VOLUNTARY PARTICIPATION**

Participation in this study is voluntary. If you decide not to participate in this study, your decision will not affect your future relations with the MoHCC, its personnel, and associated hospitals. If you decide to participate, you are free to withdraw your consent and to discontinue participation at any time without penalty.

**ADDITIONAL ELEMENTS**

You have the right to receive information on the Digital Health Systems that you may be concerned about

**OFFER TO ANSWER QUESTIONS**

Before you sign this form, please ask any questions on any aspect of this study that is unclear to you. You may take as much time as necessary to think it over.

**PROBLEMS OR QUESTIONS**

For any more questions that you may have about this study, please contact the Principal Investigator:

**Dr Richard Makurumidze on +263772759296.**

**Study Title: Evidence generation on the impact of digital health systems on Reproductive, Maternal, Newborn and Child Health Outcomes.**

**AUTHORIZATION**

I have read the above information, or it has been read to me. I have had the opportunity to ask questions and all questions that I have asked have been answered to my satisfaction. In case I need more information, I will contact Dr Richard Makurumidze Phone number(s) +263 772 759 296.

I consent voluntarily to participate as a subject in this study and understand that I have the right to withdraw from the study at any time without in any way affecting my further medical care or interactions with MoHCC

Name of Research Participant (please print)

Signature of Participant Date

_____________

Signature of Witness Date

[the above two lines should appear on forms signed by legal representatives of the participant, for example the parents of a minor.]

_______________________________ _________ ______ ______________

Name of Staff Obtaining Consent(Optional) Signature Date

YOU WILL BE OFFERED A COPY OF THIS CONSENT FORM TO KEEP.

If you have any questions concerning this study or consent form beyond those answered by the investigator, including questions about the research, your rights as a research participant or research-related injuries; or if you feel that you have been treated unfairly and would like to talk to someone other than a member of the research team, please feel free to contact the Joint Research Ethics Committee (JREC) on telephone +263 242 708140/791631 ext 2241/2 or JREC Office No.4., 5th Floor, Faculty of Medicine and Health Sciences Building, Parirenyatwa, Harare or the Medical Research Council of Zimbabwe (MRCZ) on +263 86 44073772. The MRCZ Offices are located at 20 Cambridge Road, Avondale, Harare.

**Audio recording**

*The session may have an audio recording for data collection purposes during this study only. If you agree, kindly indicate your authorization below:*

**Statement of Consent to be Audiotaped**

I understand that photographs / audio recordings may be taken during the study. *(Please choose YES or NO by inserting your initials in the relevant box)*

- I agree to **being audio recorded Yes**

**No**

_______________________________ _________ ______ ______________

Name of Participant (please print) Signature Date

___________________________________________________________________

***Educating to Change Lives***

**DEPARTMENT OF GLOBAL, PUBLIC HEALTH AND FAMILY MEDICINE**

P. O. Box A178

Avondale

Harare, Zimbabwe

Telephone: +263 (242)791631

Ext. 2276/2277

Email: [globalpublichealthfm@medsch.uz.ac.zw](mailto:globalpublichealthfm@medsch.uz.ac.zw)

Chairman: Dr R Makurumidze, MBChB (UZ), MPH (UZ), PhD (VUB)


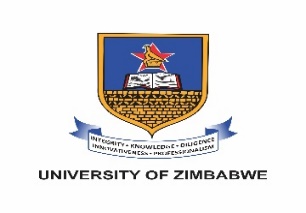


**FACULTY OF MEDICINE AND HEALTH SCIENCES**

**English** Informed Consent Form – Focus Group Discussion

***STUDY TITLE: Evidence Generation On The Impact Of Digital Health Systems On Reproductive, Maternal, Newborn And Child Health Outcomes.***

Principal Investigator: Dr Richard Makurumidze

Phone number(s): +263772759296

**WHAT YOU SHOULD KNOW ABOUT THIS RESEARCH STUDY:**

This study aims to generate evidence on the impact of digital health systems on Reproductive, Maternal, Newborn, and Child Health outcomes in Zimbabwe in order to inform future digital health advancements in the country. Should you agree to participate, the focus group discussion will take approximately one hour

1. We give you this consent so that you may read about the purpose, risks, and benefits of this research study.
2. We cannot promise that this research will benefit you directly
3. You have the right to agree to take part now and change your mind later or to refuse to take part
4. Whatever you decide, it will not affect your interactions with the Ministry of Health and Child Care
5. Please review this consent form carefully. Ask any questions before you make a decision
6. Your participation is voluntary.

**PURPOSE**

You are being asked to participate in a research study of assessing the impact of digital health systems on reproductive, maternal, newborn, and child health outcomes. The purpose of the study is to ascertain how the Electronic Health Record (EHR) system implementation has affected maternal and neonatal health outcomes, including the cost-effectiveness, in Zimbabwe.You were selected to participate in this study because you are a client of the public health facility in this district. There will be approximately 600 participants in this study.

**PROCEDURES AND DURATION**

If you decide to participate, we will discuss about the benefits, challenges and barriers of implementing EHR at site you will be representing. The discussion will take place as part of a group and will be guided by a focus group discussion guide. Each member of the group will have an opportunity to share their views during the process guided by a facilitator from the research team. There will also be a notetaker who will be recording the proceedings. The discussion is expected to take about an hour.

**RISKS AND DISCOMFORTS**

Some participants might feel uncomfortable when discussing some challenges they encounter during service provision. We reassure you that responses collected will be held in privacy and confidentiality will be maintained. Your participation in the study will not affect their relationship with the MoHCC

**BENEFITS AND/OR COMPENSATION**

There are no direct benefits for you as a participant in this study. Generating evidence on the impact of digital health systems on Reproductive, Maternal, Newborn and Child Health Outcomes will provide critical review that will be utilized in planning and subsequent policy generation as Zimbabwe continues to embrace technological advancements in its healthcare system. This evaluation will be instrumental in strengthening the health data system from which decisions are made.

**CONFIDENTIALITY**

If you indicate your willingness to participate in this study by signing this document, the records will be kept in strict confidentiality under lock and key. They will only be available to authorized study staff. The records will not be discussed with any people who are not part of the study staff

Under some circumstances, the JREC or MRCZ may need to review the study documents for compliance audits.

**ADDITIONAL COSTS**

There will be no additional costs to your participation in this study

**VOLUNTARY PARTICIPATION**

Participation in this study is voluntary. If you decide not to participate in this study, your decision will not affect your future relations with the MoHCC, its personnel, and associated hospitals. If you decide to participate, you are free to withdraw your consent and to discontinue participation at any time without penalty.

**ADDITIONAL ELEMENTS**

You have the right to receive information on the Digital Health Systems that you may be concerned about

**OFFER TO ANSWER QUESTIONS**

Before you sign this form, please ask any questions on any aspect of this study that is unclear to you. You may take as much time as necessary to think it over.

**PROBLEMS OR QUESTIONS**

For any more questions that you may have about this study, please contact the Principal Investigator:

**Dr Richard Makurumidze on +263772759296.**

**Study Title: Evidence generation on the impact of digital health systems on Reproductive, Maternal, Newborn and Child Health Outcomes.**

**AUTHORIZATION**

I have read the above information, or it has been read to me. I have had the opportunity to ask questions and all questions that I have asked have been answered to my satisfaction. In case I need more information, I will contact Dr Richard Makurumidze Phone number(s) +263 772 759 296.

I consent voluntarily to participate as a subject in this study and understand that I have the right to withdraw from the study at any time without in any way affecting my further medical care or interactions with MoHCC

___________

Name of Research Participant (please print)

Signature of Participant Date

_____________

Signature of Witness Date

[the above two lines should appear on forms signed by legal representatives of the participant, for example the parents of a minor.]

_______________________________ _________ __ ______________

Name of Staff Obtaining Consent(Optional) Signature Date

YOU WILL BE OFFERED A COPY OF THIS CONSENT FORM TO KEEP.

If you have any questions concerning this study or consent form beyond those answered by the investigator, including questions about the research, your rights as a research participant or research-related injuries; or if you feel that you have been treated unfairly and would like to talk to someone other than a member of the research team, please feel free to contact the Joint Research Ethics Committee (JREC) on telephone +263 242 708140/791631 ext 2241/2 or JREC Office No.4., 5th Floor, Faculty of Medicine and Health Sciences Building, Parirenyatwa or the Medical Research Council of Zimbabwe (MRCZ) on +263 86 44073772. The MRCZ Offices are located at 20 Cambridge Road, Avondale, Harare.

**Audio Recording and Photography**

*The session may have an audio recording for data collection purposes during this study only. If you agree, kindly indicate your authorization below:*

**Statement of Consent to be photographed and/or Audiotaped**

I understand that photographs / audio recordings may be taken during the study. *(For each statement, please choose YES or NO by inserting your initials in the relevant box)*

- I agree to having my **photograph taken Yes**

**No**

- I agree to **being audio recorded Yes**

**No**

_______________________________ ___________ ________

Name of Participant (please print) Signature Date

___________________________________________________________________

***Educating to Change Lives***

**DEPARTMENT OF GLOBAL, PUBLIC HEALTH AND FAMILY MEDICINE**

P. O. Box A178

Avondale

Harare, Zimbabwe

Telephone: +263 (242)791631

Ext. 2276/2277

Email: [globalpublichealthfm@medsch.uz.ac.zw](mailto:globalpublichealthfm@medsch.uz.ac.zw)

Chairman: Dr R Makurumidze, MBChB (UZ), MPH (UZ), PhD (VUB)


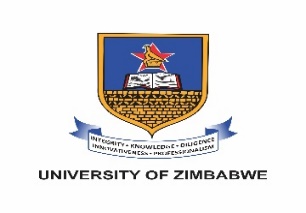


**FACULTY OF MEDICINE AND HEALTH SCIENCES**

**English** Informed Consent Form – Health Worker

***STUDY TITLE: Evidence Generation On The Impact Of Digital Health Systems On Reproductive, Maternal, Newborn And Child Health Outcomes.***

Principal Investigator: Dr Richard Makurumidze

Phone number(s): +263772759296

**WHAT YOU SHOULD KNOW ABOUT THIS RESEARCH STUDY:**

This study aims to generate evidence on the impact of digital health systems on Reproductive, Maternal, Newborn, and Child Health outcomes in Zimbabwe to inform future digital health advancements in the country.

1. We give you this consent so that you may read about the purpose, risks, and benefits of this research study.
2. We cannot promise that this research will benefit you directly
3. You have the right to agree to take part now, change your mind later or to refuse to take part
4. Whatever you decide, it will not affect your interactions with the Ministry of Health and Child Care
5. Please review this consent form carefully. Ask any questions before you make a decision
6. Your participation is voluntary.

**PURPOSE**

You are being asked to participate in a research study of assessing the impact of digital health systems on reproductive, maternal, newborn, and child health outcomes. The purpose of the study is to ascertain how the Electronic Health Record (EHR) system implementation has affected maternal and neonatal health outcomes, including the cost-effectiveness, in Zimbabwe.You were selected as a potential participant in this study because you were identified as a health service provider in the country’s public healthcare system. There will be approximately 600 participants in this study.

**PROCEDURES AND DURATION**

If you decide to participate, we will discuss about the benefits, challenges and barriers of implementing EHR at the site you will be representing. The interviewer take you through the process guided by a preset interview guide. During the interview if you consent and audio recording of your conversation might be recorded for data collection processes. The interview is expected to take about 20-25 minutes.

**RISKS AND DISCOMFORTS**

Some participants might feel uncomfortable when discussing some challenges they encounter during service provision. We reassure you that responses collected will be held in privacy and confidentiality will be maintained. Your participation in the study will not affect their relationship with the MoHCC

**BENEFITS AND/OR COMPENSATION**

There are no direct benefits for you as a participant in this study. Generating evidence on the impact of digital health systems on Reproductive, Maternal, Newborn and Child Health Outcomes will provide critical review that will be utilized in planning and subsequent policy generation as Zimbabwe continues to embrace technological advancements in its healthcare system. This evaluation will be instrumental in strengthening the health data system from which decisions are made.

**CONFIDENTIALITY**

If you indicate your willingness to participate in this study by signing this document, the records will be kept in strict confidentiality under lock and key. They will only be available to authorized study staff. The records will not be discussed with any people who are not part of the study staff

Under some circumstances, the JREC or MRCZ may need to review the study documents for compliance audits.

**ADDITIONAL COSTS**

There will be no additional costs to your participation in this study

**VOLUNTARY PARTICIPATION**

Participation in this study is voluntary. If you decide not to participate in this study, your decision will not affect your future relations with the MoHCC, its personnel, and associated hospitals. If you decide to participate, you are free to withdraw your consent and to discontinue participation at any time without penalty.

**ADDITIONAL ELEMENTS**

You have the right to receive information on the Digital Health Systems that you may be concerned about

**OFFER TO ANSWER QUESTIONS**

Before you sign this form, please ask any questions on any aspect of this study that is unclear to you. You may take as much time as necessary to think it over.

**PROBLEMS OR QUESTIONS**

For any more questions that you may have about this study, please contact the Principal Investigator:

**Dr Richard Makurumidze on +263772759296.**

**Study Title: Evidence generation on the impact of digital health systems on Reproductive, Maternal, Newborn and Child Health Outcomes.**

**AUTHORIZATION**

I have read the above information, or it has been read to me. I have had the opportunity to ask questions and all questions that I have asked have been answered to my satisfaction. In case I need more information, I will contact Dr Richard Makurumidze Phone number(s) +263 772 759 296.

I consent voluntarily to participate as a subject in this study and understand that I have the right to withdraw from the study at any time without in any way affecting my further medical care or interactions with MoHCC

Name of Research Participant (please print)

Signature of Participant Date

_____________

Signature of Witness Date

[the above two lines should appear on forms signed by legal representatives of the participant, for example the parents of a minor.]

_______________________________ _________ ______ ______________

Name of Staff Obtaining Consent(Optional) Signature Date

YOU WILL BE OFFERED A COPY OF THIS CONSENT FORM TO KEEP.

If you have any questions concerning this study or consent form beyond those answered by the investigator, including questions about the research, your rights as a research participant or research-related injuries; or if you feel that you have been treated unfairly and would like to talk to someone other than a member of the research team, please feel free to contact the Joint Research Ethics Committee (JREC) on telephone +263 242 708140/791631 ext 2241/2 or JREC Office No.4., 5th Floor, Faculty of Medicine and Health Sciences Building, Parirenyatwa, Harare or the Medical Research Council of Zimbabwe (MRCZ) on +263 86 44073772. The MRCZ Offices are located at 20 Cambridge Road, Avondale, Harare.

**Audio recording**

*The session may have an audio recording for data collection purposes during this study only. If you agree, kindly indicate your authorization below:*

**Statement of Consent to be Audiotaped**

I understand that photographs / audio recordings may be taken during the study. *(Please choose YES or NO by inserting your initials in the relevant box)*

- I agree to **being audio recorded Yes**

**No**

_______________________________ _________ ______ ______________

Name of Participant (please print) Signature Date

___________________________________________________________________

***Educating to Change Lives***

**DEPARTMENT OF GLOBAL, PUBLIC HEALTH AND FAMILY MEDICINE**

P. O. Box A178

Avondale

Harare, Zimbabwe

Telephone: +263 (242)791631

Ext. 2276/2277

Email: [globalpublichealthfm@medsch.uz.ac.zw](mailto:globalpublichealthfm@medsch.uz.ac.zw)

Chairman: Dr R Makurumidze, MBChB (UZ), MPH (UZ), PhD (VUB)


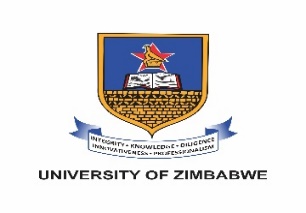


**FACULTY OF MEDICINE AND HEALTH SCIENCES**

**Evidence generation on the impact of digital health systems on Reproductive, Maternal, Newborn and Child Health Outcomes.**

**Introduction**

This study aims to investigate and understand the specific impacts that the implementation of an Electronic Health Record (EHR) system has had on maternal and neonatal health outcomes in Zimbabwe. Additionally, it will strengthen the capacity of the Ministry of Health and Childcare (MOHCC) in utilizing the EHR platform**.**

**Instructions**

- This survey will take approximately fifteen (20-25) minutes of your time.
- Your responses will be digitally captured and stored confidentially with a secure database.
- Your responses will be analysed along with other responses and presented in aggregate back to health facilities.
- Your participation in this survey is entirely voluntary.
- However, you are encouraged to participate as the information you provide is important to improve Electronic Health Records (E-HR) implementation in Zimbabwe.

**Target Population**

- Nurses
- Doctors
- Reception Clerks
- Nurse Aides
- Data Entry Clerks
- Pharmacy Staff
- Laboratory staff
- Health Information Officers

**Section A: Socio-Demographic Data**

**1. Gender**

- Male
- Female

2.**Age**……………………………………………………………………………………………………………………………

3.**Years of experience**………………………………………………………………………………………………..

**4. What is your designation?**

- Nurse
- Doctor
- Data Entry Clerks
- Laboratory staff
- Pharmacy staff
- Other, specify

**5. For how long have you been using E-HR at this health facility?**

**Section B: How EHR have influenced maternal health indicators such as prenatal care visits, maternal mortality rates, and complication management**

***Please tick all that applies***

**How have EHR systems influenced the frequency and consistency of prenatal care visits?**

**In what ways do EHR contribute to reducing maternal mortality rates?**

- EHR enable easy access to past medical and obstetric history
- EHR helps in identifying patients at risk for complications early on.
- EHR incorporate clinical guidelines and protocols for managing pregnancy complications, ensuring consistent, high-quality care.
- EHR have built-in tools to calculate and flag high-risk
- EHR ensure that any provider can understand a patient's risk profile quickly and respond appropriately.
- Other, please explain

**How do EHR systems assist in managing pregnancy-related complications?**

- EHR can flag abnormal lab values, vital signs, or other indicators, prompting immediate follow-up.
- EHR tracks trends in chronic conditions like hypertension and diabetes, helping in early intervention and management adjustments.
- EHR provide evidence-based recommendations for managing common complications, aiding in timely and appropriate care decisions.
- Providers can review a patient’s entire health history to better understand any underlying issues contributing to complications.
- EHR records every intervention, which helps providers see what’s working and refine treatment for better outcomes.
- Other, please explain

**What benefits does EHR provide for data quality in maternal health?**

- EHR create a single, comprehensive patient record accessible across care teams and facilities, ensuring consistent information sharing.
- EHR reduce handwritten notes, minimizing errors and inconsistencies in patient data.
- Providers can quickly review previous visits, lab results, and imaging, which supports informed decision-making in ongoing care.
- EHR enable seamless communication between staff fostering a collaborative approach.
- Other, please explain

**How do EHR systems enhance the accuracy of maternal health data?**

- EHR decrease reliance on handwritten notes, minimizing transcription errors.
- EHR systems use structured fields for consistent and accurate data entry.
- Information is updated instantly, reflecting the most current patient status.
- EHR flag abnormal values, ensuring accurate documentation and follow-up
- EHR automatically import lab results, reducing manual input and error
- Other, please explain

**Section C: How EHR systems have improved the accuracy and accessibility of maternal and neonatal health data**.

**In what ways does EHR improve the accessibility of maternal health data?**

- EHR stores all patient records in one system, accessible to authorized providers.
- Providers can access patient data from various locations, facilitating continuity of care.
- Many EHRs offer portals where patients can access their health information, improving engagement.
- EHR can integrate with other systems, making data accessible across facilities.
- EHR records can be accessed anytime, supporting timely decision-making in emergencies.
- Other, please explain.

**How have EHR systems improved data accuracy in neonatal health records?**

- EHR records neonatal vitals accurately, with no manual data entry errors.
- EHR tracks medication doses precisely, reducing errors in neonatal care.
- EHR include neonatal growth standards, ensuring consistent documentation.
- EHR accurately record vaccinations, preventing duplications or omissions.
- Neonatal lab results and imaging are automatically updated in the EHR, ensuring accurate records.

**How does EHR support data-driven improvements in maternal and neonatal health care?****

- EHR allow analysis of maternal and neonatal health trends over time.
- Providers can monitor outcomes, identifying areas for quality improvement.
- EHR data aids in formulating evidence-based maternal and neonatal health policies.
- EHR help pinpoint high-risk groups, allowing for targeted intervention
- EHR data supports maternal and neonatal research, leading to advancements in care practices.

**Section D: Impact** **of EHR systems on the efficiency and effectiveness of healthcare providers in delivering maternal and neonatal care**

**How does the EHR system improve your efficiency in maternal child care?**

- EHR streamline data entry, allowing focus more on patient care.
- Easy access to a complete maternal history, aiding faster decision-making.
- EHR helps manage appointments efficiently, reducing missed visits and rescheduling time.
- EHR automate billing, reducing administrative workload and speeding up the reimbursement process.
- EHR provide immediate access to lab and imaging results, cutting down on delays in diagnosis.

**In what ways does EHR enhance the effectiveness of maternal** **care at this facility?**

- EHR have Clinical Decision Support Tools guiding providers in best practices for maternal health.
- EHR maintain complete records, improving the continuity and quality of maternal care.
- EHR tracks prescribed medications and flags interactions, supporting safer maternal medication use.
- EHR send alerts for abnormal readings, enabling timely interventions in complications.
- Other, please specify

**How do EHR systems improve your efficiency in neonatal care** **at this facility?**

- EHR integrate neonatal monitors, allowing providers to track vitals without manual entry. EHR notifies providers immediately of abnormal neonatal parameters, reducing response time.
- EHR consolidate patient information, making handoffs between shifts faster and more accurate.
- Providers can instantly access neonatal growth charts and immunization status.
- EHR facilitate team collaboration, enabling efficient coordinated care for neonates.

**How do EHR systems enhance the effectiveness of neonatal care** **at this facility?**

- EHR help ensure accurate medication dosing, crucial for neonatal safety.
- Lab results are available instantly, enabling faster response to neonatal health changes.
- EHR make it easier for neonatal care providers to collaborate with specialists when needed.
- EHR allow for detailed record-keeping, improving care continuity and future reference**s**

**How do EHR systems support continuous quality improvement in maternal and neonatal care?**

- EHR allow providers to analyse maternal and neonatal outcomes, identifying areas for improvement.
- EHR help to support audits
- EHR compile data on complications, helping healthcare teams address frequent issues.
- EHR data can be used in training sessions to improve provider skills based on real cases.
- EHR tracks outcomes after specific interventions, aiding in the evaluation of treatment effectiveness.

**Challenges and barriers faced in the implementation and use of EHR systems in maternal and neonatal healthcare settings**

**What are the technical challenges in implementing EHR in maternal and neonatal healthcare?**

- Frequent downtimes
- Difficulty integrating EHR with other systems limits data sharing between departments or facilities.
- Complicated EHR interfaces can be time-consuming and challenging for staff to navigate.
- Lack of specialized fields tailored to maternal and neonatal care.
- Lack of regular updates and maintenance of EHR systems
- Other, please specify

**What are the main user-related challenges with EHR adoption in maternal and neonatal care?**

- Staff may be reluctant to transition from paper records to EHR systems.
- EHR systems require extensive training, especially for non-technical users.
- Manual data entry can be time-consuming and detract from direct patient care.
- Excessive alerts can lead to “alert fatigue,” causing providers to overlook important notifications.
- Adjusting established workflows to accommodate EHR use can be challenging
- Other, please specify

**What data security and privacy concerns arise with EHR use in maternal and neonatal care at this facility?**

- EHR is vulnerable to cyberattacks, which could compromise sensitive patient information.
- Ensuring that only authorized personnel can access maternal and neonatal data is a challenge.
- Sharing EHR data across systems or facilities can increase exposure to security vulnerabilities.
- Other, please specify

**What organizational and infrastructural barriers affect EHR implementation in maternal and neonatal healthcare/**

- Limited access to IT personnel can hinder troubleshooting and system maintenance.
- Poor internet connectivity
- Power outages
- Lack of power backup
- Outdated equipment
- Staff shortages
- Untrained staff
- Turnaround time for resolving system challenges
- Inadequate functional computers/ tablets
- Other, please specify

**What are your suggestions to improve the functioning and utilisation of EHR for maternal, neonatal and child health?**

……………………………………………………………………………………………………………………………

Thank you for your time

___________________________________________________________________

***Educating to Change Lives***

**DEPARTMENT OF GLOBAL, PUBLIC HEALTH AND FAMILY MEDICINE**

P. O. Box A178

Avondale

Harare, Zimbabwe

Telephone: +263 (242)791631

Ext. 2276/2277

Email: [globalpublichealthfm@medsch.uz.ac.zw](mailto:globalpublichealthfm@medsch.uz.ac.zw)

Chairman: Dr R Makurumidze, MBChB (UZ), MPH (UZ), PhD (VUB)


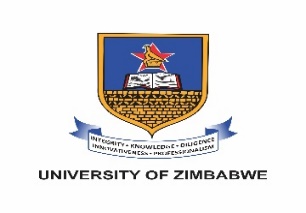


**FACULTY OF MEDICINE AND HEALTH SCIENCES**

**Evidence generation on the impact of digital health systems on Reproductive, Maternal, Newborn and Child Health Outcomes**

**Data Collection Tools**

**Key informant interview guide**

**Welcome and introduction**

Greet the key informant warmly and provide an overview of the interview's purpose. Emphasize the importance of their insights in understanding the impact of digital health interventions on maternal, newborn, and child health.

**Participant background**

Collect demographic information and inquire about the key informant's professional background, role, and experience in maternal, newborn, and child heal

**Understanding the Context: Overview** of Maternal, Newborn, and Child Health Services

- May you please provide an overview of existing maternal, newborn, and child health services in your setting? What are the main challenges and gaps in providing these services?
- What is the current status of digital health interventions in your community or other settings you know about?
- Inquire/probe about any ongoing programs or initiatives related to digital health and MNCH

**Perceived Impact of EHR**

- How have digital health interventions influenced maternal, newborn, and child health outcomes?
- What role are digital health interventions playing in the delivery of MNCH services
- What specific tools or applications are used and how are they integrated into routine healthcare practice
- Probe on observed improvements or challenges associated with the use of digital tools
- **Socio-economic Implications of EHR**
- What is your understanding of the economic implications of digital health interventions?
- Probe on perceptions regarding the cost-effectiveness, affordability, and sustainability of these interventions in their working environment
- Summarize key points discussed during the interview and thank the participants for their valuable contribution.

1. **The Main Components of the EHR Implementation**

- Hardware (database servers, desktop computers, tablets/computers, printers, scanners, etc)
- EHR software (EHR application, interface module + upgrades (frequency of upgrades), onsite deployment vs centralised deployment
- Implementation assistance (IT specialists/consultants for installation and maintenance, technicians/electricians, hardware and network installation, workflow designs and redesigns
- Training (healthcare workers/cadres, office staff – before and during implementation, pre, during and post-deployment training costs including refresher training)
- Network fees and Maintenance (hardware and software licences maintenance agreements, internet/telecoms costs, Utilities and other bills, IT support, new staff to be hired, data capturers and analysts). Regular systems checks and performance optimisation

1. **EHR Flow map components**

*UNICEF’s vision for digital health (Frog Design)*


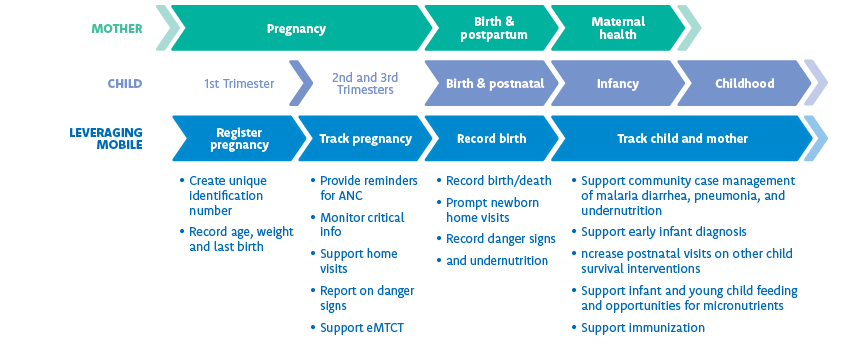


- Patient health information
- Order entry system (tests, medications and treatments)
- Decision support systems (evidence-based recommendations)
- Security protocols (confidentiality)
- Communication tools (coordination)

**Cost and Benefits Data**

- Direct costs (software purchase and licensing, hardware installation, training and migration of data from the paper-based systems to the EHR, upgrades and technical support
- Indirect Costs (costs of additional support staff, lost productivity during implementation, and other costs associated with workflow adjustments)
- Potential Benefits (quality of care, improved efficiency, shorter questions, streamlined workflows, patient safety, improved outcomes) All these will be monetised where possible
- Intangible benefits (improved decision-making, better coordination, patient satisfaction, etc)

**Potential output and outcome measures**

- Reduced length of stay
- Is the time of diagnosis reduced
- Reduction of errors in recording
- Increased efficiency (improved coordination)
- Improved quality of care
  - Antenatal and post-care visits
  - Institutional deliveries
  - Immunisations

**Impact inventory**

- Health Impact
  - Death
  - Disability
  - Discomfort
- Health system impact
- User experience impact
- Value of data
- Cross-sectoral (beyond the health system)

___________________________________________________________________

***Educating to Change Lives***

**DEPARTMENT OF GLOBAL, PUBLIC HEALTH AND FAMILY MEDICINE**

P. O. Box A178

Avondale

Harare, Zimbabwe

Telephone: +263 (242)791631

Ext. 2276/2277

Email: [globalpublichealthfm@medsch.uz.ac.zw](mailto:globalpublichealthfm@medsch.uz.ac.zw)

Chairman: Dr R Makurumidze, MBChB (UZ), MPH (UZ), PhD (VUB)


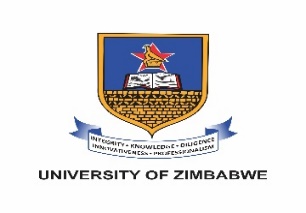


**FACULTY OF MEDICINE AND HEALTH SCIENCES**

## **Evidence generation on the impact of digital health systems on Reproductive, Maternal, Newborn and Child Health Outcomes**

## **Data Collection Tools**

1. **Focus Group Discussion Guide**

**Welcome and introductions**

- Welcome participants and express gratitude for their participation.
- Provide a brief overview of the focus group's purpose and importance in understanding the impact of digital health interventions on maternal, newborn, and child health
- Ask participants to introduce themselves, including their roles and experiences related to maternal, newborn, and child health

**Icebreaker question**

- Pose a light and non-controversial question to help participants become more comfortable and engaged
- Ensure that the discussion remains respectful and that participants feel comfortable sharing their perspectives. Encourage open dialogue and assure participants that their input is crucial for informing the research on improving MNCH outcomes using digital technologies.

**Main Discussion:**

**Perceptions and Experiences with Digital Health Interventions**

- Explore participants' general awareness of digital health interventions in their community
- Inquire about any personal experiences or encounters with digital health tools related to maternal, newborn, or child health

**Attitudes towards Digital Health Interventions**

- Probe participants on their attitudes and perceptions regarding the use of digital health interventions
- Explore potential barriers or concerns they may have about adopting or utilizing these technologies

**Impact on maternal health**

- Discuss experiences and perceptions of how digital health interventions have influenced maternal health outcomes
- Inquire about the perceived benefits or challenges related to the use of digital tools during pregnancy and postpartum

**Impact on newborn and child health**

- Explore participants' experiences or observations regarding the impact of digital health interventions on newborn and child health
- Discuss specific tools or applications used and their perceived effectiveness

**Economic considerations**

- Discuss participants' understanding of the economic implications of digital health interventions
- Explore perceptions regarding the cost-effectiveness and accessibility of these interventions in their environment

**Barriers and Facilitators**

- Identify perceived barriers to the adoption and sustained use of digital health interventions
- Discuss potential facilitators that may enhance the effectiveness and acceptance of these technologies

**Summary and closing**

- Summarize key points discussed during the focus group and thank the participants for their valuable contributions.

__________________________________________________________________

***Educating to Change Lives***
